# Supplementary material
Source: publisher figshare collection journal article supplement (https://acs.figshare.com/ndownloader/files/5975832)
Supplement: Supplementary file 1 [file 5975832]

Compound	SMILES	EAAT1 IC50 (µM)	EAAT2 IC50 (µM)	EAAT3 IC50 (µM)
1a	O=C(OCC)CN(C/1=O)C(SC1=C/C2=CC=C(C3=C(Cl)C=CC(C(O)=O)=C3)O2)=O	12 [4.95 ± 0.05]	>300 [<3.5]	>300 [<3.5]
1b	O=C(OCC)CN(C/1=O)C(SC1=C/C2=CC=C(C3=CC=C(Cl)C(C(O)=O)=C3)O2)=O	>300 [<3.5]	>300 [<3.5]	>300 [<3.5]
1c	O=C(OCC)CN(C/1=O)C(SC1=C/C2=CC=C(C3=C(Cl)C=C(C(O)=O)C([H])=C3)O2)=O	>300 [<3.5]	>300 [<3.5]	>300 [<3.5]
1d	O=C(OCC)CN(C/1=O)C(SC1=C/C2=CC=C(C3=C(OC)C=CC(C(O)=O)=C3)O2)=O	12 [4.97 ± 0.11]	>300 [<3.5]	>300 [<3.5]
1e	OC(C1=CC(C2=CC=C(/C=C3SC(N(CC(OCC)=O)C\3=O)=O)O2)=C(OCC4=CC=CC=C4)C=C1)=O	>300 [<3.5]	>300 [<3.5]	>300 [<3.5]
1f	O=C(OCC)CN(C/1=O)C(SC1=C/C2=CC=C(C3=C(C)C=CC(C(O)=O)=C3)O2)=O	~100 [~4.0]	>300 [<3.5]	>300 [<3.5]
1g	O=C(OCC)CN(C/1=O)C(SC1=C/C2=CC=C(C3=C(F)C=CC(C(O)=O)=C3)O2)=O	~100 [~4.0]	>300 [<3.5]	>300 [<3.5]
1h	CCOC(CN(C/1=O)C(SC1=C/C(O2)=CC=C2C3=C(C=CC=C4)C4=CC(C(O)=O)=C3)=O)=O	38 [4.42 ± 0.04]	>300 [<3.5]	>300 [<3.5]
1i	O=C(OCC)CN(C/1=O)C(SC1=C/C2=CC=C(C3=C(Cl)C=CC(Cl)=C3)O2)=O	>300 [<3.5]	>300 [<3.5]	>300 [<3.5]
1j	O=C(OCC)CN(C/1=O)C(SC1=C/C2=CC=C(C3=C(Cl)C=CC([N+]([O-])=O)=C3)O2)=O	>300 [<3.5]	>300 [<3.5]	>300 [<3.5]
1k	O=C(OCC)CN(C/1=O)C(SC1=C/C2=CC=C(C3=C(Cl)C=C([N+]([O-])=O)C([H])=C3)O2)=O	>300 [<3.5]	>300 [<3.5]	>300 [<3.5]
1l	O=C(OCC)CN(C/1=O)C(SC1=C/C2=CC=C(C3=C([H])C=C(Cl)C([N+]([O-])=O)=C3)O2)=O	>300 [<3.5]	>300 [<3.5]	>300 [<3.5]
1m	O=C(OCC)CN(C/1=O)C(SC1=C/C2=CC=C(C3=CC=CC=C3)O2)=O	>300 [<3.5]	>300 [<3.5]	>300 [<3.5]
1n	OC(C1=CC=C(Cl)C(C2=CC=CC(/C=C3SC(N(CC(OCC)=O)C\3=O)=O)=C2)=C1)=O	45 [4.8 ± 0.33]	>300 [<3.5]	>300 [<3.5]
1o	OC(C1=CC=C(Cl)C(C2=CC=C(/C=C3SC(N(CC(OCC)=O)C\3=O)=O)C=C2)=C1)=O	>300 [<3.5]	>300 [<3.5]	>300 [<3.5]
1p	OC(C1=CC=C(Cl)C(C2=CC=C(/C=C3SC(N(CC(OCC)=O)C\3=O)=O)S2)=C1)=O	>300 [<3.5]	>300 [<3.5]	>300 [<3.5]
1q	O=C(OCC)CN1C(CN(CC2=CC=C(C3=C(Cl)C=CC(C(O)=O)=C3)O2)C1=O)=O	>300 [<3.5]	>300 [<3.5]	>300 [<3.5]
2a	O=C(OCC)CN(C/1=O)C(SC1=C/C2=CC=C(C3=C(Br)C=C(C)C([H])=C3)O2)=O	>300 [<3.5]	>300 [<3.5]	>300 [<3.5]
2b	O=C(OCC)CN(C/1=O)C(SC1=C/C2=CC=C(SC3=C([H])C=CC([H])=C3)O2)=O	>300 [<3.5]	>300 [<3.5]	>300 [<3.5]
2c	O=C(OCC)CN(C/1=O)C(SC1=C/C2=CC=C(N3CCOCC3)O2)=O	>300 [<3.5]	>300 [<3.5]	>300 [<3.5]
2d	O=C(OCC)CN(C/1=O)C(SC1=C/C2=CC=C(N3CCCCC3)O2)=O	>300 [<3.5]	>300 [<3.5]	>300 [<3.5]
2e	O=C(OCC)CN(C/1=O)C(SC1=C/C2=CC=C(C)O2)=O	>300 [<3.5]	>300 [<3.5]	>300 [<3.5]
3a	O=C(/C(S1)=C/C2=CC=C(C3=C(Cl)C=CC(C(O)=O)=C3)O2)N(CC(OC)=O)C1=O	23 [4.64 ± 0.07]	>300 [<3.5]	>300 [<3.5]
3b	O=C(/C(S1)=C/C2=CC=C(C3=C(Cl)C=CC(C(O)=O)=C3)O2)N(C(C)C(OC)=O)C1=O	35 [4.46 ± 0.07]	>300 [<3.5]	>300 [<3.5]
3c	O=C(/C(S1)=C/C2=CC=C(C3=C(Cl)C=CC(C(O)=O)=C3)O2)N(C)C1=O	>300 [<3.5]	>300 [<3.5]	>300 [<3.5]
3d	O=C(/C(S1)=C/C2=CC=C(C3=C(Cl)C=CC(C(O)=O)=C3)O2)N(CC(NC4=CC=C(C)C=C4)=O)C1=O	>300 [<3.5]	>300 [<3.5]	>300 [<3.5]
4a	O=C(/C(S1)=C/C2=CC=C(C(O)=O)C=C2)N(CC(OCC)=O)C1=O	>300 [<3.5]	>300 [<3.5]	>300 [<3.5]
4b	OC1=C(/C=C2SC(N(CC(OCC)=O)C\2=O)=O)C=CC(C(O)=O)=C1	>300 [<3.5]	>300 [<3.5]	>300 [<3.5]
4c	OC(C1=CC=CC(/C=C2SC(N(CC(OCC)=O)C\2=O)=O)=C1)=O	>300 [<3.5]	>300 [<3.5]	>300 [<3.5]
4d	OC(C1=C(O)C=CC(/C=C2SC(N(CC(OCC)=O)C\2=O)=O)=C1)=O	>300 [<3.5]	>300 [<3.5]	>300 [<3.5]
4e	OC(C1=CC=C(O)C(/C=C2SC(N(CC(OCC)=O)C\2=O)=O)=C1)=O	>300 [<3.5]	>300 [<3.5]	>300 [<3.5]
4f	O=C(/C(S1)=C/C2=CC(C3=NN=NN3)=CC=C2)N(CC(OCC)=O)C1=O	>300 [<3.5]	>300 [<3.5]	>300 [<3.5]
4g	OC(CC1=CC=CC(/C=C2SC(N(CC(OCC)=O)C\2=O)=O)=C1)=O	>300 [<3.5]	>300 [<3.5]	>300 [<3.5]
4h	OC(CC1=CC=C(O)C(/C=C2SC(N(CC(OCC)=O)C\2=O)=O)=C1)=O	>300 [<3.5]	>300 [<3.5]	>300 [<3.5]
4i	OC(CCC1=CC=CC(/C=C2SC(N(CC(OCC)=O)C\2=O)=O)=C1)=O	>300 [<3.5]	>300 [<3.5]	>300 [<3.5]
4j	OC(CCC1=CC=C(O)C(/C=C2SC(N(CC(OCC)=O)C\2=O)=O)=C1)=O	>300 [<3.5]	>300 [<3.5]	>300 [<3.5]
4k	OC(/C=C/C1=CC=CC(/C=C2SC(N(CC(OCC)=O)C\2=O)=O)=C1)=O	>300 [<3.5]	>300 [<3.5]	>300 [<3.5]
